# Supplementary material for: A reusable single-cell patterning strategy based on an ultrathin metal microstencil
Source: Royal Society of Chemistry journal article supplement (doi:10.1039/d0lc01175d), 2021-01-01
Supplement: d0lc01175d1.pdf [file d0lc01175d1.pdf]

## Supporting Information

### Reusable Single-Cell Patterning Strategy Based on Ultrathin Metal Microstencil

Yuhan Song, Qingqing Tian, Jianhong Liu, Wenting Guo, Yingnan Sun\*, Shusheng Zhang\*

Collaborative Innovation Center of Tumor Marker Detection Technology, Equipment and Diagnosis-Therapy Integration in Universities of Shandong, Shandong Province Key Laboratory of Detection Technology for Tumor Makers, School of Chemistry and Chemical Engineering, Linyi University, Linyi, 276005, China.

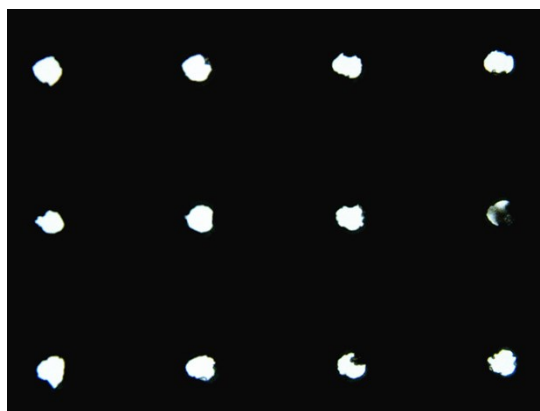

**Figure S1.** A UTmS chip fabricated with non-optimal parameter has a charred and irregularity edge.

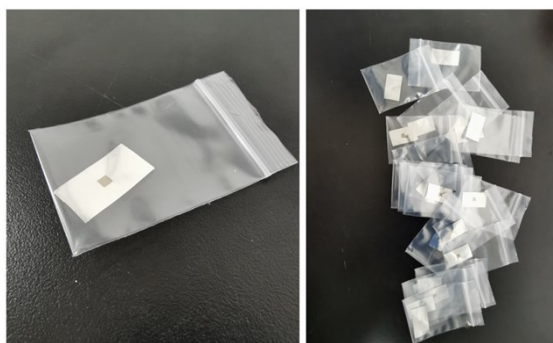

**Figure S2.** The UTmS chips can be easily fabricated on a commercial laser-drilling equipment with general configurations. The optimized parameters can be used for mass production.

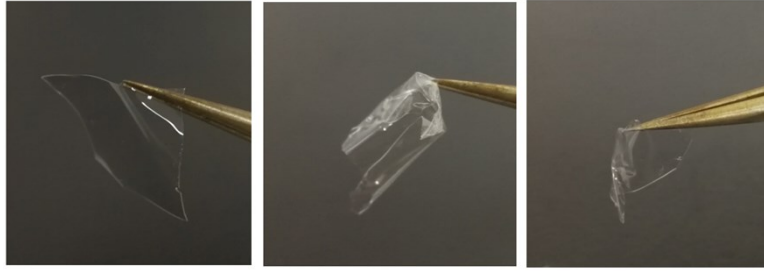

**Figure S3.** The PDMS layer with about 10 $\mu$ m thickness is difficult to handle with a tweezer because it is easy to bend or collapse or conglutinate.

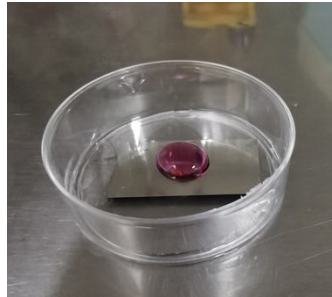

**Figure S4.** The UTmS chips can be reused for single cells patterning after a series of cleaning operations including ultrasonic, organic cleaning and high temperature drying.

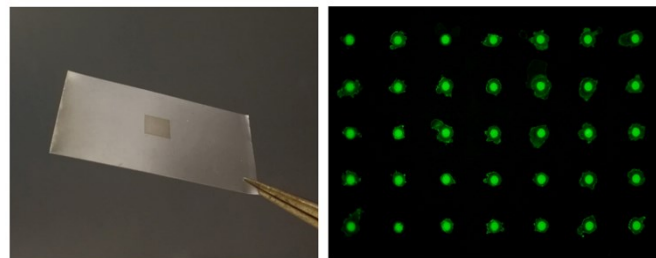

**Figure S5.** A thicker stainless steel stencil with 10  $\mu$ m thickness possessed good bending strength (a), but without excellent flexibility characteristic. It is not suitable for single-cell patterning without additional fixture. The fluorescence intensity obtained from the back side shows apparent liquid leakage under standing conditions.
